# Supplementary material for: Severe SARS-CoV-2 Infection in a Cat with Hypertrophic Cardiomyopathy
Source: MDPI journal article supplement (doi:10.3390/v13081510), 2021-07-31
Supplement: s1 [file s1]

**Table S1.**

SARS-CoV-2 sequences used for phylogenetic reconstruction and alias used in the phylogenetic tree in Fig. S1.

| Alias | Strain                      | Alias | Strain                         |
|-------|-----------------------------|-------|--------------------------------|
| NY-1  | USA/NY-MSHSPSP-PV17829/2020 | AZ-7  | USA/AZ-TG483516/2020           |
| OR-1  | USA/OR-OHSU-4261/2020       | AZ-8  | USA/AZ-TG446877/2020           |
| OR-2  | USA/OR-OHSU-4398/2020       | AZ-9  | USA/AZ-TG448671/2020           |
| OR-3  | USA/OR-OHSU-4788/2020       | AZ-10 | USA/AZ-TG487122/2020           |
| OR-4  | USA/OR-OHSU-3793/2020       | AZ-11 | USA/AZ-TG426533/2020           |
| OR-5  | USA/OR-OHSU-4163/2020       | AZ-12 | USA/AZ-TG493886/2020           |
| OR-6  | USA/OR-OHSU-4154/2020       | AZ-13 | USA/AZ-TG569483/2020           |
| OR-8  | USA/OR-OHSU-6566/2020       | AZ-14 | USA/AZ-TG486581/2020           |
| OR-9  | USA/OR-OHSU-5320/2020       | AZ-15 | USA/AZ-TG493898/2020           |
| OR-10 | USA/OR-OHSU-5309/2020       | AZ-16 | USA/AZ-TG602442/2020           |
| OR-11 | USA/OR-OHSU-3965/2020       | AZ-17 | USA/AZ-TG486899/2020           |
| OR-12 | USA/OR-OHSU-4441/2020       | IL-1  | USA/IL-IDPH-I-000292/2020      |
| AK-1  | USA/AK-PHL597/2020          | IL-2  | USA/IL-IDPH-MAC-S-0001352/2020 |
| WA-2  | USA/WA-S3255/2020           | DE-2  | USA/DE-CDC-2-3713992/2020      |
| WA-4  | USA/WA-S4667/2020           | DE-3  | USA/DE-CDC-2-3713979/2020      |
| WA-5  | USA/WA-S4406/2020           | SC-1  | USA/SC-CDC-2-3714351/2020      |
| WA-6  | USA/WA-S5020/2020           | MD-1  | USA/MD-MDH-0372/2020           |
| WA-7  | USA/WA-S3302/2020           | ME-1  | USA/ME-HETL-J0300/2020         |
| WA-8  | USA/WA-S5022/2020           | WA-1  | USA/WA-UW-23609/2020           |
| WA-9  | USA/WA-S4409/2020           | WA-3  | USA/WA-UW-31214/2020           |
| WA-10 | USA/WA-S4127/2020           | WA-17 | USA/WA-UW-32819/2020           |
| WA-11 | USA/WA-S4010/2021           | WA-21 | USA/WA-UW-60665/2021           |
| WA-12 | USA/WA-S4017/2021           | NV-1  | USA/NV-CDC-LC0005839/2021      |
| WA-13 | USA/WA-S4011/2021           | VA-7  | USA/VA-CDC-LC0006004/2021      |
| WA-14 | USA/WA-S3608/2020           | WA-18 | USA/WA-CDC-LC0013210/2021      |
| WA-15 | USA/WA-S4408/2020           | WA-22 | USA/WA-CDC-LC0013201/2021      |
| WA-16 | USA/WA-S4128/2020           | DC-1  | USA/DC-CDC-LC0000359/2020      |
| WA-19 | USA/WA-S4753/2021           | OR-7  | USA/OR-CDC-2-3693586/2020      |
| WA-20 | USA/WA-S4373/2021           | IL-3  | USA/IL-NM-1708/2020            |
| WA-23 | USA/WA-S5046/2020           | IL-4  | USA/IL-NM-4753/2020            |
| WA-24 | USA/WA-S3937/2021           | CA-1  | USA/CA-ALSR-3879/2020          |
| WA-25 | USA/WA-S4046/2021           | VA-1  | USA/VA-DCLS-1647/2020          |
| UT-1  | USA/UT-UPHL-2009714/2020    | VA-2  | USA/VA-DCLS-1716/2020          |
| UT-2  | USA/UT-UPHL-2012051821/2020 | VA-3  | USA/VA-DCLS-1735/2020          |
| SC-2  | USA/SC-DHEC-0007/2020       | VA-4  | USA/VA-DCLS-1713/2020          |
| DE-1  | USA/DE-DHSS-F1006556/2020   | VA-5  | USA/VA-DCLS-1683/2020          |
| AZ-1  | USA/AZ-TG517518/2020        | VA-6  | USA/VA-DCLS-1744/2020          |
| AZ-2  | USA/AZ-TG532109/2020        | VA-8  | USA/VA-DCLS-1714/2020          |

|      |                      |      |                       |
|------|----------------------|------|-----------------------|
| AZ-3 | USA/AZ-TG532103/2020 | VA-9 | USA/VA-DCLS-1724/2020 |
| AZ-4 | USA/AZ-TG491777/2020 | WH01 | Wuhan/WH01/2019       |
| AZ-5 | USA/AZ-TG403434/2020 | Hu-1 | Wuhan/Hu-1/2019       |
| AZ-6 | USA/AZ-TG490896/2020 |      |                       |

---

**Table S2.**

References and acknowledgements for the SARS-CoV-2 sequences used in phylogenetic analysis.

| Author                                            | n  | publication title                                                                                                        | publication URL                                                                                                 | strains                                                                                                                                                                                                                                                                                                                                                                              |
|---------------------------------------------------|----|--------------------------------------------------------------------------------------------------------------------------|-----------------------------------------------------------------------------------------------------------------|--------------------------------------------------------------------------------------------------------------------------------------------------------------------------------------------------------------------------------------------------------------------------------------------------------------------------------------------------------------------------------------|
| Weijun Chen et al                                 | 1  | Genomic characterisation and epidemiology of 2019 novel coronavirus: implications for virus origins and receptor binding | <a href="https://dx.doi.org/10.1016/S0140-6736(20)30251-8">https://dx.doi.org/10.1016/S0140-6736(20)30251-8</a> | Wuhan/WH01/2019                                                                                                                                                                                                                                                                                                                                                                      |
| Zhang et al                                       | 1  | A new coronavirus associated with human respiratory disease in China                                                     | <a href="https://dx.doi.org/10.1038/s41586-020-2008-3">https://dx.doi.org/10.1038/s41586-020-2008-3</a>         | Wuhan/Hu-1/2019                                                                                                                                                                                                                                                                                                                                                                      |
| Jolene Bowers et al                               | 17 | unknown                                                                                                                  | unknown                                                                                                         | USA/AZ-TG517518/2020, USA/AZ-TG532109/2020, USA/AZ-TG532103/2020, USA/AZ-TG491777/2020, USA/AZ-TG403434/2020, USA/AZ-TG490896/2020, USA/AZ-TG483516/2020, USA/AZ-TG446877/2020, USA/AZ-TG448671/2020, USA/AZ-TG487122/2020, USA/AZ-TG426533/2020, USA/AZ-TG493886/2020, USA/AZ-TG569483/2020, USA/AZ-TG486581/2020, USA/AZ-TG493898/2020, USA/AZ-TG602442/2020, USA/AZ-TG486899/2020 |
| SEARCH Alliance San Diego with Tracy Basler et al | 1  | unknown                                                                                                                  | unknown                                                                                                         | USA/CA-ALSR-3879/2020                                                                                                                                                                                                                                                                                                                                                                |

|                                                                                                           |   |         |         |                                                                                                                                                                                                                                                                                                                                                       |
|-----------------------------------------------------------------------------------------------------------|---|---------|---------|-------------------------------------------------------------------------------------------------------------------------------------------------------------------------------------------------------------------------------------------------------------------------------------------------------------------------------------------------------|
| Pavitra Roychoudhury et al                                                                                | 4 | unknown | unknown | USA/WA-UW-23609/2020, USA/WA-UW-31214/2020, USA/WA-UW-32819/2020, USA/WA-UW-60665/2021                                                                                                                                                                                                                                                                |
| Keith Gagnon et al                                                                                        | 2 | unknown | unknown | USA/IL-IDPH-I-000292/2020, USA/IL-IDPH-MAC-S-0001352/2020                                                                                                                                                                                                                                                                                             |
| Erin L. Young et al                                                                                       | 2 | unknown | unknown | USA/UT-UPHL-2009714/2020, USA/UT-UPHL-2012051821/2020                                                                                                                                                                                                                                                                                                 |
| Chen J et al with Pathogenomics group Dagdag R et al Ramon Lorenzo-Redondo et al Matluk et al             | 1 | unknown | unknown | USA/AK-PHL597/2020                                                                                                                                                                                                                                                                                                                                    |
| Peter W. Cook et al                                                                                       | 5 | unknown | unknown | USA/IL-NM-1708/2020, USA/IL-NM-4753/2020                                                                                                                                                                                                                                                                                                              |
| Virginia DCLS et al                                                                                       | 8 | unknown | unknown | USA/ME-HETL-J0300/2020, USA/NV-CDC-LC0005839/2021, USA/DC-CDC-LC0000359/2020, USA/VA-CDC-LC0006004/2021, USA/WA-CDC-LC0013210/2021, USA/WA-CDC-LC0013201/2021, USA/VA-DCLS-1647/2020, USA/VA-DCLS-1716/2020, USA/VA-DCLS-1735/2020, USA/VA-DCLS-1713/2020, USA/VA-DCLS-1683/2020, USA/VA-DCLS-1744/2020, USA/VA-DCLS-1714/2020, USA/VA-DCLS-1724/2020 |
| Gregory Hovan et al                                                                                       | 1 | unknown | unknown | USA/DE-DHSS-F1006556/2020                                                                                                                                                                                                                                                                                                                             |
| Krista Queen et al                                                                                        | 3 | unknown | unknown | USA/SC-CDC-2-3714351/2020, USA/DE-CDC-2-3713992/2020, USA/DE-CDC-2-3713979/2020                                                                                                                                                                                                                                                                       |
| Flores et al Ana S. Gonzalez-Reiche et al Maryland Department of Health Laboratories Administration et al | 1 | unknown | unknown | USA/SC-DHEC-0007/2020                                                                                                                                                                                                                                                                                                                                 |
|                                                                                                           | 1 | unknown | unknown | USA/NY-MSHSPSP-PV17829/2020                                                                                                                                                                                                                                                                                                                           |
|                                                                                                           | 1 | unknown | unknown | USA/MD-MDH-0372/2020                                                                                                                                                                                                                                                                                                                                  |

---

|                            |        |         |         |                                                                                                                                                                                                                                                                                                                                                                                                                                                                                                                                                                                                                                                                     |
|----------------------------|--------|---------|---------|---------------------------------------------------------------------------------------------------------------------------------------------------------------------------------------------------------------------------------------------------------------------------------------------------------------------------------------------------------------------------------------------------------------------------------------------------------------------------------------------------------------------------------------------------------------------------------------------------------------------------------------------------------------------|
| Deborah A. Nickerson et al | 1<br>9 | unknown | unknown | USA/WA-S3255/2020, USA/WA-S4667/2020, USA/WA-S4406/2020, USA/WA-S5020/2020, USA/WA-S3302/2020, USA/WA-S5022/2020, USA/WA-S4409/2020, USA/WA-S4127/2020, USA/WA-S4010/2021, USA/WA-S4017/2021, USA/WA-S4011/2021, USA/WA-S3608/2020, USA/WA-S4408/2020, USA/WA-S4128/2020, USA/WA-S4753/2021, USA/WA-S4373/2021, USA/WA-S5046/2020, USA/WA-S3937/2021, USA/WA-S4046/2021<br>USA/OR-OHSU-4261/2020, USA/OR-OHSU-4398/2020, USA/OR-OHSU-4788/2020, USA/OR-OHSU-3793/2020, USA/OR-OHSU-4163/2020, USA/OR-OHSU-4154/2020, USA/OR-OHSU-6566/2020, USA/OR-OHSU-5320/2020, USA/OR-OHSU-5309/2020, USA/OR-OHSU-3965/2020, USA/OR-OHSU-4441/2020<br>USA/OR-CDC-2-3693586/2020 |
| Brendan L. O'Connell et al | 1<br>1 | unknown | unknown |                                                                                                                                                                                                                                                                                                                                                                                                                                                                                                                                                                                                                                                                     |
| Queen et al                | 1      | unknown | unknown |                                                                                                                                                                                                                                                                                                                                                                                                                                                                                                                                                                                                                                                                     |

---

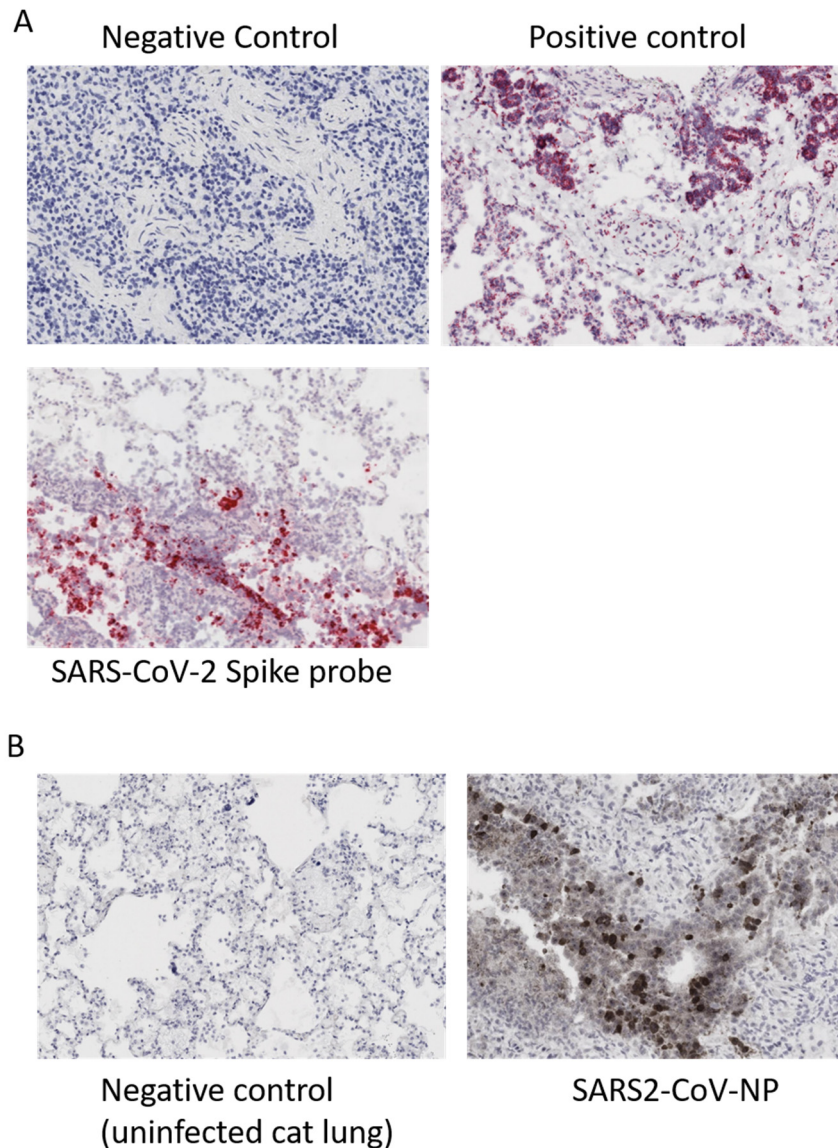

**Fig. S1.**

In situ hybridization and immunohistochemistry controls. (A) *In situ* hybridization: left top panel, probe targeting DapB gene from *Bacillus subtilis* strain SMY was used as a negative control (Advanced Cell Diagnostics catalog no. 310043); right top panel, probe targeting feline host protein peptidylprolyl isomerase B (PPIB) was used as a positive control (Advanced Cell Diagnostics catalog no. 455011); bottom panel, tissue from the SARS-CoV-2 cat probed with the S-gene probe. (B) Immunohistochemistry: left panel, negative cat control lung tissue incubated with SARS-CoV-2 mAb N-specific mAb B6G11; right panel, positive cat control lung tissue incubated with SARS-CoV-2 mAb N-specific mAb B6G11.
